# Supplementary material for: Vitamin D Deficiency and COVID-19: A Biological Database Study on Pathways and Gene-Disease Associations
Source: MDPI journal article supplement (doi:10.3390/ijms232214256), 2022-11-17
Supplement: s1 [file s1]

## Supplementary material

|                                                                                                                 |    |
|-----------------------------------------------------------------------------------------------------------------|----|
| Figure S1. Linkage disequilibrium for vitamin D deficiency .....                                                | 2  |
| Table S1. Genes and variants associated with COVID-19.....                                                      | 3  |
| Figure S2. Linkage disequilibrium for COVID-19 (chromosome 3).....                                              | 6  |
| Figure S3. Linkage disequilibrium for COVID-19 (chromosome 9, 19 and 21).....                                   | 7  |
| Table S2. GWAS catalog of vitamin D deficiency.....                                                             | 8  |
| Table S3. GWAS catalog of COVID-19 .....                                                                        | 12 |
| Figure S4. Expression heat map by genes and tissues (COVID-19) .....                                            | 25 |
| Figure S5. REVIGO for vitamin d deficiency and covid 19 .....                                                   | 26 |
| Figure S6. Enrichment analysis of COVID-19 genes regarding GO terms in MSigDB on immunological signatures. .... | 27 |
| Figure S7. Vitamin D deficiency gene-disease network .....                                                      | 29 |
| Figure S8. Vitamin D deficiency gene-disease heat map .....                                                     | 30 |
| Figure S9. COVID-19 gene-disease network .....                                                                  | 31 |
| Figure S10. COVID-19 gene-disease heat map.....                                                                 | 32 |
| Figure S11. Enrichment analysis of VD deficiency and the VDR gene .....                                         | 33 |

**Figure S1. Linkage disequilibrium for vitamin D deficiency**

**A**

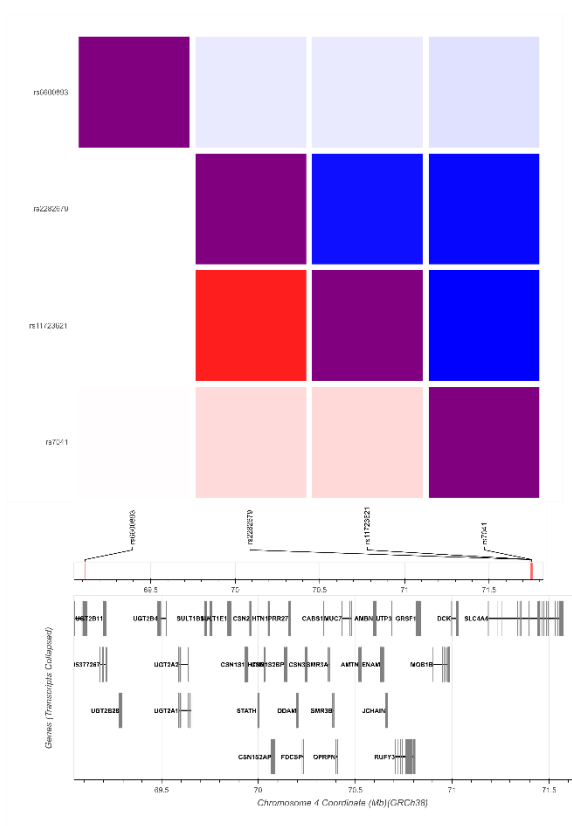

**B**

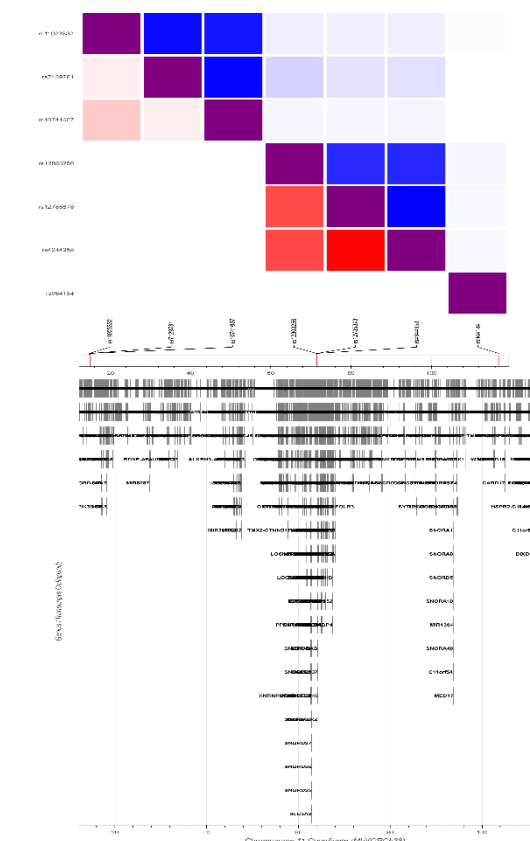

**Figure S1.** Linkage disequilibrium on chromosome 4 (A) and chromosome 11 (B) for vitamin D deficiency. The degree of correlation between variants within the same chromosome is shown (the higher the degree of correlation, the more likely it is). that these variants are inherited together). Variants with linkage disequilibrium are represented in red. Source: LDLINK

**Table S1. Genes and variants associated with COVID-19**

| Variant     | Risk allele | Gene               | Location (chr: position) | P-value              | Study accession |              |
|-------------|-------------|--------------------|--------------------------|----------------------|-----------------|--------------|
| rs657152    | A           | ABO                | 9:133263862              | $5 \times 10^{-8}$   | GCST90000255    |              |
| rs71325088  | C           | LZTFL1, SLC6A20    | 3:45821460               | $3 \times 10^{-54}$  | GCST010936      |              |
| rs143334143 | A           | CCHCR1             | 6:31153649               | $2 \times 10^{-10}$  |                 |              |
| rs6489867   | T           | OAS1               | 12:112925745             | $1 \times 10^{-9}$   |                 |              |
| rs11085727  | T           | TYK2               | 19:10355447              | $1 \times 10^{-13}$  |                 |              |
| rs114301457 | T           | EFNA4              | 1:155066988              | $7 \times 10^{-10}$  |                 |              |
| rs41264915  | A           | THBS3-AS1, THBS3   | 1:155197995              | $1 \times 10^{-12}$  | GCST90104030    |              |
| rs73064425  | T           | LZTFL1             | 3:45859597               | $2 \times 10^{-133}$ |                 |              |
| rs343320    | A           | PLSCR1             | 3:146517122              | $5 \times 10^{-9}$   |                 |              |
| rs56162149  | T           | ACSL6              | 5:131995059              | $8 \times 10^{-11}$  |                 |              |
| rs9271609   | T           | HLA-DRB1, HLA-DQA1 | 6:32623820               | $3 \times 10^{-9}$   |                 |              |
| rs28368148  | G           | IFNA10             | 9:21206606               | $2 \times 10^{-9}$   |                 |              |
| rs61882275  | G           | ELF5               | 11:34482745              | $2 \times 10^{-10}$  |                 |              |
| rs56106917  | G           | GALNT9, FBRSL1     | 12:132489231             | $2 \times 10^{-9}$   |                 |              |
| rs9577175   | T           | ATP11A, MCF2L      | 13:112889041             | $4 \times 10^{-11}$  |                 |              |
| rs4424872   | T           | RGMA               | 15:93046840              | $9 \times 10^{-13}$  |                 |              |
| rs117169628 | A           | SLC22A31           | 16:89196249              | $4 \times 10^{-9}$   |                 |              |
| rs2532300   | T           | KANSL1             | 17:46152620              | $4 \times 10^{-9}$   |                 |              |
| rs3848456   | A           | RNU6-1313P, TAC4   | 17:49863260              | $4 \times 10^{-11}$  |                 |              |
| rs12610495  | G           | DPP9               | 19:4717660               | $4 \times 10^{-36}$  |                 |              |
| rs73510898  | A           | ZGLP1              | 19:10305768              | $2 \times 10^{-11}$  |                 |              |
| rs34536443  | C           | TYK2               | 19:10352442              | $7 \times 10^{-17}$  |                 |              |
| rs368565    | T           | FUT2               | 19:48697960              | $4 \times 10^{-11}$  |                 |              |
| rs17860115  | A           | IFNAR2             | 21:33230000              | $1 \times 10^{-21}$  |                 |              |
| rs8178521   | T           | IL10RB             | 21:33287378              | $4 \times 10^{-12}$  |                 |              |
| rs35370143  | TAC         | LINC00649          | 21:33959663              | $1 \times 10^{-9}$   |                 |              |
| rs60870724  | C           | CEP97, NXPE3       | 3:101776487              | $7 \times 10^{-14}$  |                 | GCST90103486 |

|             |    |                  |                       |                     |              |
|-------------|----|------------------|-----------------------|---------------------|--------------|
| rs8176719   | TC | ABO              | 9:133257522           | $4 \times 10^{-19}$ |              |
| rs73062389  | A  | SLC6A20          | 3:45793925            | $4 \times 10^{-19}$ | GCST90103487 |
| rs879055593 | T  | ABO              | 9:133271182           | $7 \times 10^{-34}$ | GCST90096800 |
| rs190509934 | C  | ACE2             | X:15602217            | $5 \times 10^{-13}$ |              |
| rs2531743   | G  | LZTFL1, SLC6A20  | 3:45796808            | $3 \times 10^{-12}$ | GCST90103428 |
| rs754119466 | G  | -                | Mapping not available | $3 \times 10^{-9}$  | GCST90093366 |
| rs146100088 | ¿? | MYRIP            | 3:39838227            | $7 \times 10^{-8}$  | GCST90027246 |
| rs35044562  | ¿? | LZTFL1           | 3:45867532            | $4 \times 10^{-14}$ |              |
| rs183817891 | ¿? | XCR1             | 3:46053730            | $1 \times 10^{-11}$ |              |
| rs138476573 | ¿? | PAFAH1B2P2, RMST | 12:97636026           | $8 \times 10^{-8}$  |              |
| rs11385942  | ¿? | -                | Mapping not available | $3 \times 10^{-16}$ | GCST012399   |
| rs10774671  | A  | OAS1             | 12:112919388          | $4 \times 10^{-13}$ | GCST90095123 |
| rs77534576  | T  | RNU6-1313P, TAC4 | 17:49863303           | $4 \times 10^{-9}$  |              |
| rs2109069   | A  | DPP9             | 19:4719431            | $1 \times 10^{-21}$ |              |
| rs74956615  | A  | RAVER1           | 19:10317045           | $1 \times 10^{-11}$ |              |
| rs10490770  | C  | SLC6A20, LZTFL1  | 3:45823240            | $1 \times 10^{-73}$ | GCST90095124 |
| rs1886814   | C  | FOXP4-AS1        | 6:41534945            | $1 \times 10^{-9}$  |              |
| rs72711165  | C  | TMEM65           | 8:124324323           | $2 \times 10^{-9}$  |              |
| rs1819040   | A  | KANSL1           | 17:46142465           | $2 \times 10^{-10}$ |              |
| rs13050728  | C  | IFNAR2           | 21:33242905           | $3 \times 10^{-20}$ |              |
| rs11919389  | C  | PDCL3P4          | 3:101705614           | $3 \times 10^{-15}$ | GCST90095125 |
| rs2271616   | T  | SLC6A20          | 3:45796521            | $2 \times 10^{-34}$ |              |
| rs912805253 | T  | ABO              | 9:133274084           | $1 \times 10^{-39}$ |              |
| rs9411378   | C  | ABO              | 9:133270015           | $5 \times 10^{-20}$ | GCST90027245 |
| rs6603626   | ¿? | LAMP2, RNU7-37P  | X:120484021           | $6 \times 10^{-8}$  |              |
| rs13078854  | G  | SLC6A20, LZTFL1  | 3:45820440            | $2 \times 10^{-18}$ | GCST90027249 |
| rs140221038 | ¿? | FYCO1            | 3:45954233            | $1 \times 10^{-13}$ |              |
| rs111793438 | ¿? | XCR1             | 3:46081695            | $2 \times 10^{-11}$ |              |
| rs1173773   | C  | NPR3             | 5:32750877            | $5 \times 10^{-8}$  | GCST012002   |
| rs62575331  | G  | U2               | 9:115647521           | $6 \times 10^{-8}$  | GCST012001   |

**Table S1.** Genes and variants associated with COVID-19. Information on the genes to which these variants belong to, the risk allele of each SNP, location in the genome (chromosome: chr) for hg38 coordinates, and P-Value (existing degree of significance between that variant and the disease). Study accession number obtained from GWAS catalog.

**Figure S2. Linkage disequilibrium for COVID-19 (chromosome 3)**

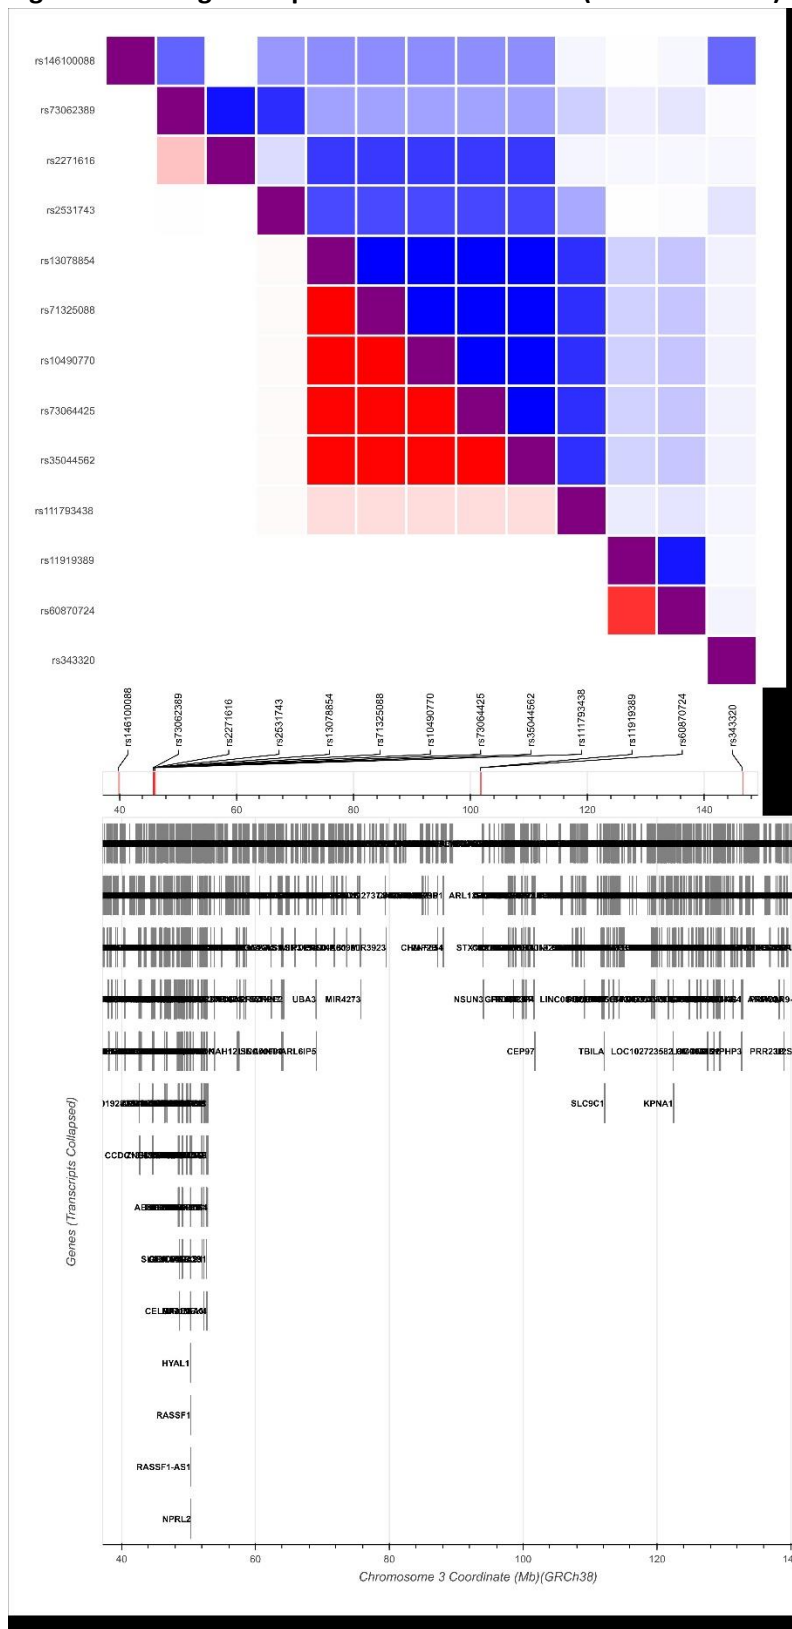

**Figure S2.** Linkage disequilibrium on chromosome 3 for COVID-19. The degree of correlation between variants within the same chromosome is shown (the higher the degree of correlation, the more likely it is) that these variants are inherited together). Variants with linkage disequilibrium are represented in red. Source: LDLINK

**Figure S3. Linkage disequilibrium for COVID-19 (chromosome 9, 19 and 21)**

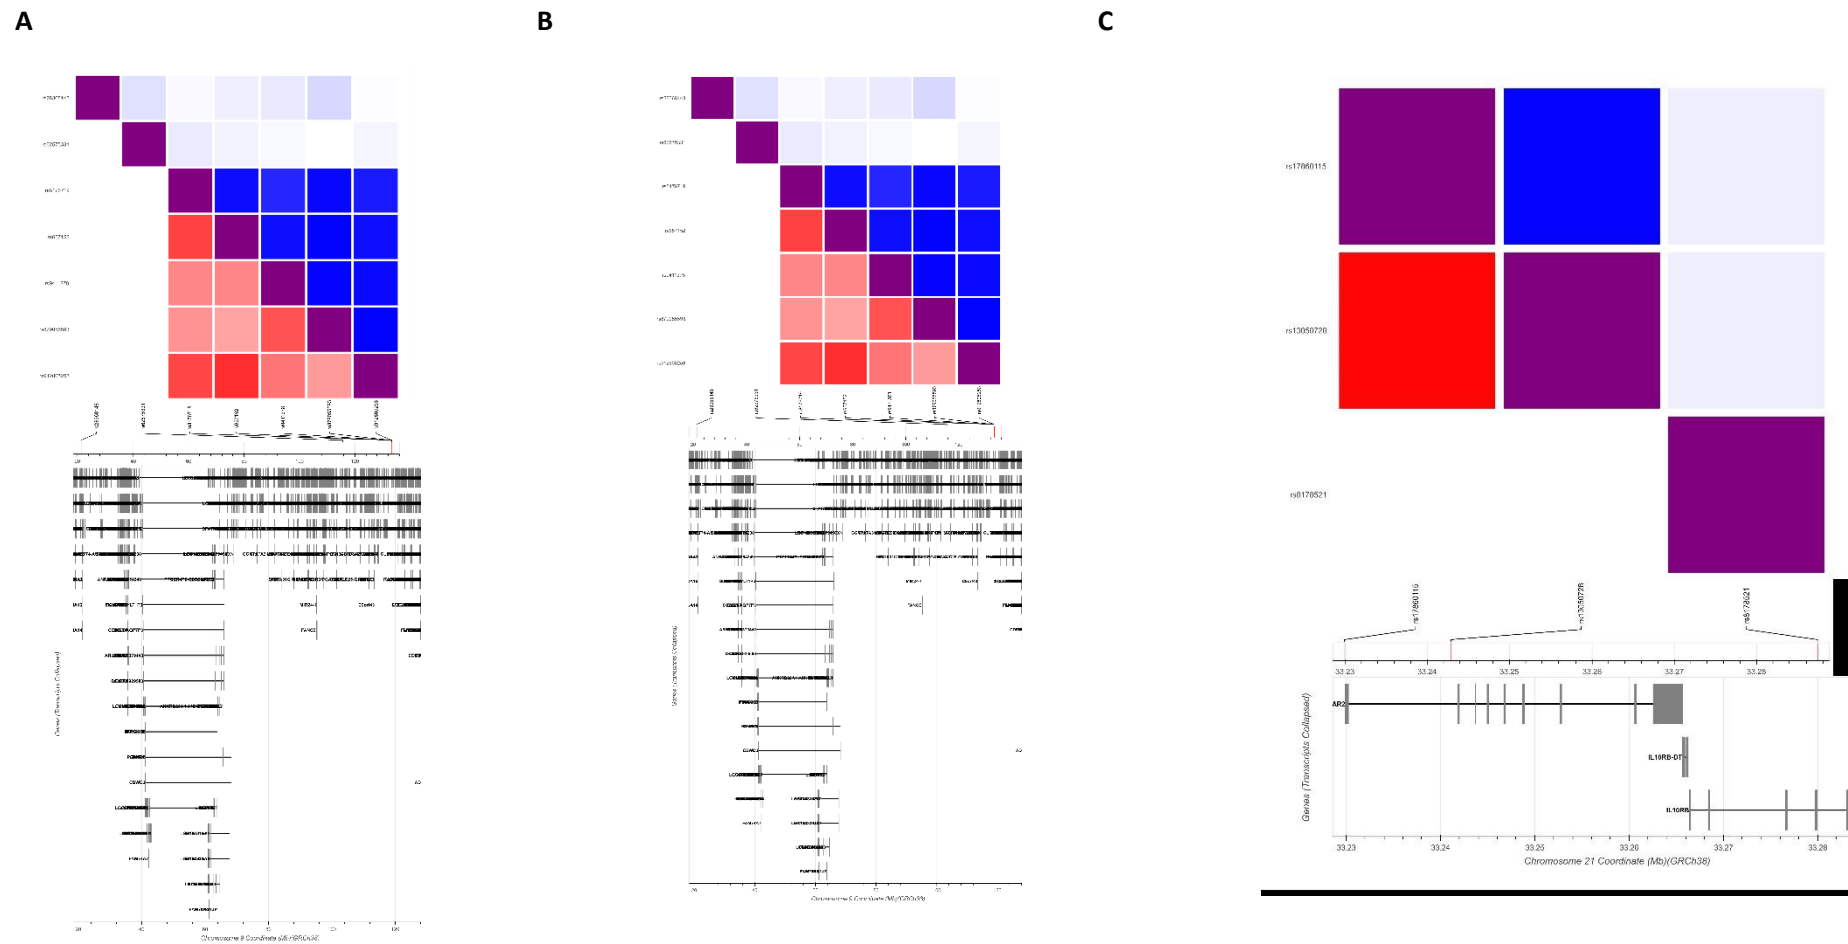

**Figure S3.** Linkage disequilibrium on chromosome 9 (A), chromosome 19 (B) and chromosome 21 (C) for COVID-19. The degree of correlation between variants within the same chromosome is shown (the higher the degree of correlation, the more likely it is that these variants are inherited together). Variants with linkage disequilibrium are represented in red. Source: LDLINK

**Table S2. GWAS catalog of vitamin D deficiency**

| Variant and risk allele | P-value                | RAF   | Beta                      | CI                | Mapped gene      | Reported trait          | Trait(s)             | Study accession | Location     |
|-------------------------|------------------------|-------|---------------------------|-------------------|------------------|-------------------------|----------------------|-----------------|--------------|
| rs7129781-<br><b>C</b>  | 4 x 10 <sup>-33</sup>  | 0.071 | 0.189<br>unit<br>increase | [0.16-<br>0.22]   | CYP2R1           | Vitamin D insufficiency | vitamin D deficiency | GCST90020244    | 11:14890871  |
| rs4944958-<br><b>A</b>  | 9 x 10 <sup>-143</sup> | 0.203 | 0.259<br>unit<br>increase | [0.24-<br>0.28]   | NADSYN1          | Vitamin D insufficiency | vitamin D deficiency | GCST90020244    | 11:71457027  |
| rs964184-<br><b>G</b>   | 3 x 10 <sup>-14</sup>  | 0.129 | 0.095<br>unit<br>increase | [0.071-<br>0.119] | ZPR1             | Vitamin D insufficiency | vitamin D deficiency | GCST90020244    | 11:116778201 |
| rs10859995-<br><b>T</b> | 3 x 10 <sup>-33</sup>  | 0.42  | 0.105<br>unit<br>decrease | [0.087-<br>0.123] | HAL              | Vitamin D insufficiency | vitamin D deficiency | GCST90020244    | 12:95981904  |
| rs1532085-<br><b>A</b>  | 1 x 10 <sup>-8</sup>   | 0.383 | 0.05<br>unit<br>increase  | [0.032-<br>0.068] | ALDH1A2          | Vitamin D insufficiency | vitamin D deficiency | GCST90020244    | 15:58391167  |
| rs1800588-<br><b>T</b>  | 2 x 10 <sup>-10</sup>  | 0.212 | 0.066<br>unit<br>increase | [0.046-<br>0.086] | LIPC,<br>ALDH1A2 | Vitamin D insufficiency | vitamin D deficiency | GCST90020244    | 15:58431476  |
| rs55791371-<br><b>C</b> | 1 x 10 <sup>-9</sup>   | 0.121 | 0.081<br>unit<br>decrease | [0.056-<br>0.106] | SMARCA4          | Vitamin D insufficiency | vitamin D deficiency | GCST90020244    | 19:11077477  |
| rs10426201-<br><b>G</b> | 8 x 10 <sup>-20</sup>  | 0.169 | 0.106<br>unit<br>decrease | [0.082-<br>0.13]  | SULT2A1          | Vitamin D insufficiency | vitamin D deficiency | GCST90020244    | 19:47881492  |
| rs3750297-<br><b>A</b>  | 3 x 10 <sup>-10</sup>  | 0.283 | 0.059<br>unit<br>increase | [0.041-<br>0.077] | PADI1            | Vitamin D insufficiency | vitamin D deficiency | GCST90020244    | 1:17233181   |



|                         |                        |       |                           |                            |                                                                |                         |                      |              |             |
|-------------------------|------------------------|-------|---------------------------|----------------------------|----------------------------------------------------------------|-------------------------|----------------------|--------------|-------------|
| rs12123821<br>-<b>T</b> | 6 x 10 <sup>-26</sup>  | 0.047 | 0.227<br>unit<br>decrease | [0.18-<br>0.27]            | FLG-AS1                                                        | Vitamin D insufficiency | vitamin D deficiency | GCST90020244 | 1:152206676 |
| rs4845491-<br><b>C</b>  | 7 x 10 <sup>-10</sup>  | 0.054 | 0.119<br>unit<br>decrease | [0.082-<br>0.156]          | SMCP,<br>LCE6A                                                 | Vitamin D insufficiency | vitamin D deficiency | GCST90020244 | 1:152877093 |
| rs8123293-<br><b>G</b>  | 3 x 10 <sup>-8</sup>   | 0.113 | 0.076<br>unit<br>decrease | [0.049-<br>0.103]          | BCAS1,<br>CYP24A1                                              | Vitamin D insufficiency | vitamin D deficiency | GCST90020244 | 20:54102016 |
| rs17217119<br>-<b>G</b> | 5 x 10 <sup>-16</sup>  | 0.193 | 0.086<br>unit<br>increase | [0.064-<br>0.108]          | BCAS1,<br>CYP24A1                                              | Vitamin D insufficiency | vitamin D deficiency | GCST90020244 | 20:54126051 |
| rs3755322-<br><b>G</b>  | 6 x 10 <sup>-12</sup>  | 0.083 | 0.104<br>unit<br>increase | [0.075-<br>0.133]          | UGT1A9,<br>UGT1A5,<br>UGT1A10,<br>UGT1A7,<br>UGT1A8,<br>UGT1A6 | Vitamin D insufficiency | vitamin D deficiency | GCST90020244 | 2:233713141 |
| rs6600893-<br><b>C</b>  | 5 x 10 <sup>-15</sup>  | 0.452 | 0.067<br>unit<br>increase | [0.049-<br>0.085]          | UGT2B11,<br>UGT2B7                                             | Vitamin D insufficiency | vitamin D deficiency | GCST90020244 | 4:69113183  |
| rs2282679-<br><b>G</b>  | 1 x 10 <sup>-200</sup> | 0.274 | 0.429<br>unit<br>increase | [0.41-<br>0.45]            | GC                                                             | Vitamin D insufficiency | vitamin D deficiency | GCST90020244 | 4:71742666  |
| rs2205262-<br><b>C</b>  | 5 x 10 <sup>-11</sup>  | 0.429 | 0.057<br>unit<br>decrease | [0.039-<br>0.075]          | LINC00536                                                      | Vitamin D insufficiency | vitamin D deficiency | GCST90020244 | 8:115999659 |
| rs11723621<br>-<b>?</b> | 2 x 10 <sup>-24</sup>  | NR    | 1.28<br>ng/mL<br>increase | [-<br>18.7708-<br>21.3308] | GC                                                             | Vitamin D insufficiency | vitamin D deficiency | GCST90101732 | 4:71749645  |

|                         |                        |      |                           |                            |                         |                         |                      |              |             |
|-------------------------|------------------------|------|---------------------------|----------------------------|-------------------------|-------------------------|----------------------|--------------|-------------|
| rs11023332<br>-<b>?</b> | 3 x 10 <sup>-11</sup>  | NR   | 0.77<br>ng/mL<br>increase | [-<br>12.2444-<br>13.7844] | PDE3B                   | Vitamin D insufficiency | vitamin D deficiency | GCST90101732 | 11:14762564 |
| rs7041-<br><b>?</b>     | 2 x 10 <sup>-9</sup>   | NR   | 0.79<br>ng/mL<br>increase | [-<br>11.0288-<br>12.6088] | GC                      | Vitamin D insufficiency | vitamin D deficiency | GCST90101732 | 4:71752617  |
| rs12803256<br>-<b>?</b> | 4 x 10 <sup>-8</sup>   | NR   | 0.65<br>ng/mL<br>increase | [-10.13-<br>11.43]         | ACTE1P                  | Vitamin D insufficiency | vitamin D deficiency | GCST90101732 | 11:71421822 |
| rs3831470-<br><b>?</b>  | 1 x 10 <sup>-6</sup>   | NR   | 0.58<br>ng/mL<br>increase | [-9.024-<br>10.184]        | NADSYN1                 | Vitamin D insufficiency | vitamin D deficiency | GCST90101732 | 11:71454899 |
| rs78359207<br>-<b>?</b> | 2 x 10 <sup>-6</sup>   | NR   | 0.59<br>ng/mL<br>increase | [-<br>8.7788-<br>9.9588]   | NPFFR2                  | Vitamin D insufficiency | vitamin D deficiency | GCST90101732 | 4:72032699  |
| rs55715230<br>-<b>?</b> | 3 x 10 <sup>-6</sup>   | NR   | 0.66<br>ng/mL<br>increase | [-<br>8.5324-<br>9.8524]   | PACRG                   | Vitamin D insufficiency | vitamin D deficiency | GCST90101732 | 6:162756538 |
| rs306141-<br><b>?</b>   | 3 x 10 <sup>-6</sup>   | NR   | 0.6<br>ng/mL<br>increase  | [-<br>8.5336-<br>9.7336]   | LINC01247,<br>LINC01824 | Vitamin D insufficiency | vitamin D deficiency | GCST90101732 | 2:6458749   |
| rs17382663<br>-<b>?</b> | 5 x 10 <sup>-6</sup>   | NR   | 0.91<br>ng/mL<br>decrease | [-8.008-<br>9.828]         | PVT1                    | Vitamin D insufficiency | vitamin D deficiency | GCST90101732 | 8:128090786 |
| rs58788626<br>-<b>?</b> | 7 x 10 <sup>-6</sup>   | NR   | 0.84<br>ng/mL<br>decrease | [-7.98-<br>9.66]           | PCNX1,<br>MAP3K9-<br>DT | Vitamin D insufficiency | vitamin D deficiency | GCST90101732 | 14:70865550 |
| rs12785878<br>-<b>?</b> | 2 x 10 <sup>-27</sup>  | 0.23 | '-'                       | '-'                        | NADSYN1                 | Vitamin D insufficiency | vitamin D deficiency | GCST000697   | 11:71456403 |
| rs2282679-<br><b>?</b>  | 2 x 10 <sup>-109</sup> | 0.29 | '-'                       | '-'                        | GC                      | Vitamin D insufficiency | vitamin D deficiency | GCST000697   | 4:71742666  |

|            |                     |      |    |    |                  |                         |                      |            |             |
|------------|---------------------|------|----|----|------------------|-------------------------|----------------------|------------|-------------|
| rs10741657 | $3 \times 10^{-20}$ | 0.40 | '- | '- | CALCB,<br>CYP2R1 | Vitamin D insufficiency | vitamin D deficiency | GCST000697 | 11:14893332 |
|------------|---------------------|------|----|----|------------------|-------------------------|----------------------|------------|-------------|

**Table S2.** GWAS catalog of vitamin D deficiency. Complete information for sets of genetic variants, regarding relative allele frequencies (RAF) and effect sizes of the associations.

**Table S3. GWAS catalog of COVID-19**

| Variant and risk allele  | P-value               | RAF  | Beta | CI          | Mapped gene        | Reported trait                                                   | Trait(s) | Study accession | Location              |
|--------------------------|-----------------------|------|------|-------------|--------------------|------------------------------------------------------------------|----------|-----------------|-----------------------|
| rs657152-<br><b>A</b>    | 5 x 10 <sup>-8</sup>  | 0.35 | '-   | [1.20-1.47] | ABO                | Severe COVID-19 infection with respiratory failure (analysis I)  | COVID-19 | GCST90000255    | 9:133263862           |
| rs11385942-<br><b>GA</b> | 9 x 10 <sup>-12</sup> | 0.09 | '-   | [1.70-2.61] | '-                 | Severe COVID-19 infection with respiratory failure (analysis II) | COVID-19 | GCST90000256    | Mapping not available |
| rs71325088-<br><b>C</b>  | 3 x 10 <sup>-54</sup> | NR   | '-   | [1.73-2.0]  | LZTFL1,<br>SLC6A20 | COVID-19 (critical illness vs population)                        | COVID-19 | GCST010936      | 3:45821460            |
| rs143334143-<br><b>A</b> | 2 x 10 <sup>-10</sup> | NR   | '-   | [1.27-1.48] | CCHCR1             | COVID-19 (critical illness vs population)                        | COVID-19 | GCST010936      | 6:31153649            |
| rs6489867-<br><b>T</b>   | 1 x 10 <sup>-9</sup>  | NR   | '-   | [1.14-1.25] | OAS1               | COVID-19 (critical illness vs population)                        | COVID-19 | GCST010936      | 12:11292574<br>5      |
| rs11085727-<br><b>T</b>  | 1 x 10 <sup>-13</sup> | NR   | '-   | [1.18-1.31] | TYK2               | COVID-19 (critical                                               | COVID-19 | GCST010936      | 19:10355447           |

|                          |           |        |    |             |                         |                                                            |          |              |                       |
|--------------------------|-----------|--------|----|-------------|-------------------------|------------------------------------------------------------|----------|--------------|-----------------------|
|                          |           |        |    |             |                         | illness vs population)                                     |          |              |                       |
| rs13050728-<br><b>T</b>  | 5 x 10-12 | NR     | '- | [1.16-1.28] | IFNAR2                  | COVID-19 (critical illness vs population)                  | COVID-19 | GCST010936   | 21:33242905           |
| rs1123573-<br><b>A</b>   | 2 x 10-8  | NR     | '- | '-          | BCL11A                  | COVID-19 (critical illness vs population or mild symptoms) | COVID-19 | GCST90104034 | 2:60480453            |
| rs2496644-<br><b>A</b>   | 2 x 10-8  | NR     | '- | '-          | FOXP4-AS1,<br>LINC01276 | COVID-19 (critical illness vs population or mild symptoms) | COVID-19 | GCST90104034 | 6:41515007            |
| rs13071258-<br><b>?</b>  | 2 x 10-8  | NR     | '- | [2.98-3.75] | '-                      | COVID-19 (critical illness vs population or mild symptoms) | COVID-19 | GCST90104036 | Mapping not available |
| rs114301457-<br><b>T</b> | 7 x 10-10 | 0.0058 | '- | [1.82-3.16] | EFNA4                   | COVID-19 (critical illness vs population or mild symptoms) | COVID-19 | GCST90104030 | 1:155066988           |

|                         |                |       |    |             |                       |                                                                           |          |              |             |
|-------------------------|----------------|-------|----|-------------|-----------------------|---------------------------------------------------------------------------|----------|--------------|-------------|
| rs41264915-<br><b>A</b> | 1 x 10-<br>12  | 0.89  | '- | [1.19-1.37] | THBS3-AS1,<br>THBS3   | COVID-19<br>(critical<br>illness vs<br>population<br>or mild<br>symptoms) | COVID-19 | GCST90104030 | 1:155197995 |
| rs73064425-<br><b>T</b> | 2 x 10-<br>133 | 0.077 | '- | [2.51-2.94] | LZTFL1                | COVID-19<br>(critical<br>illness vs<br>population<br>or mild<br>symptoms) | COVID-19 | GCST90104030 | 3:45859597  |
| rs343320-<br><b>A</b>   | 5 x 10-9       | 0.081 | '- | [1.16-1.35] | PLSCR1                | COVID-19<br>(critical<br>illness vs<br>population<br>or mild<br>symptoms) | COVID-19 | GCST90104030 | 3:146517122 |
| rs56162149-<br><b>T</b> | 8 x 10-<br>11  | 0.17  | '- | [1.13-1.26] | ACSL6                 | COVID-19<br>(critical<br>illness vs<br>population<br>or mild<br>symptoms) | COVID-19 | GCST90104030 | 5:131995059 |
| rs9271609-<br><b>T</b>  | 3 x 10-9       | 0.65  | '- | [1.09-1.19] | HLA-DRB1,<br>HLA-DQA1 | COVID-19<br>(critical<br>illness vs<br>population<br>or mild<br>symptoms) | COVID-19 | GCST90104030 | 6:32623820  |

|                         |                       |        |    |             |                   |                                                               |          |              |                  |
|-------------------------|-----------------------|--------|----|-------------|-------------------|---------------------------------------------------------------|----------|--------------|------------------|
| rs28368148-<br><b>G</b> | 2 x 10 <sup>-9</sup>  | 0.013  | '- | [1.45-2.09] | IFNA10            | COVID-19<br>(critical illness vs population or mild symptoms) | COVID-19 | GCST90104030 | 9:21206606       |
| rs61882275-<br><b>G</b> | 2 x 10 <sup>-10</sup> | 0.62   | '- | [1.1-1.2]   | ELF5              | COVID-19<br>(critical illness vs population or mild symptoms) | COVID-19 | GCST90104030 | 11:34482745      |
| rs56106917-<br><b>G</b> | 2 x 10 <sup>-9</sup>  | 0.49   | '- | [1.09-1.18] | GALNT9,<br>FBRSL1 | COVID-19<br>(critical illness vs population or mild symptoms) | COVID-19 | GCST90104030 | 12:13248923<br>1 |
| rs9577175-<br><b>T</b>  | 4 x 10 <sup>-11</sup> | 0.23   | '- | [1.12-1.24] | ATP11A,<br>MCF2L  | COVID-19<br>(critical illness vs population or mild symptoms) | COVID-19 | GCST90104030 | 13:11288904<br>1 |
| rs4424872-<br><b>T</b>  | 9 x 10 <sup>-13</sup> | 0.0079 | '- | [1.87-3.01] | RGMA              | COVID-19<br>(critical illness vs population or mild symptoms) | COVID-19 | GCST90104030 | 15:93046840      |

|                          |                       |       |    |             |                  |                                                               |          |              |             |
|--------------------------|-----------------------|-------|----|-------------|------------------|---------------------------------------------------------------|----------|--------------|-------------|
| rs117169628-<br><b>A</b> | 4 x 10 <sup>-9</sup>  | 0.15  | '- | [1.12-1.26] | SLC22A31         | COVID-19<br>(critical illness vs population or mild symptoms) | COVID-19 | GCST90104030 | 16:89196249 |
| rs2532300-<br><b>T</b>   | 4 x 10 <sup>-9</sup>  | 0.77  | '- | [1.1-1.22]  | KANSL1           | COVID-19<br>(critical illness vs population or mild symptoms) | COVID-19 | GCST90104030 | 17:46152620 |
| rs3848456-<br><b>A</b>   | 4 x 10 <sup>-11</sup> | 0.029 | '- | [1.33-1.7]  | RNU6-1313P, TAC4 | COVID-19<br>(critical illness vs population or mild symptoms) | COVID-19 | GCST90104030 | 17:49863260 |
| rs12610495-<br><b>G</b>  | 4 x 10 <sup>-36</sup> | 0.31  | '- | [1.27-1.38] | DPP9             | COVID-19<br>(critical illness vs population or mild symptoms) | COVID-19 | GCST90104030 | 19:4717660  |
| rs73510898-<br><b>A</b>  | 2 x 10 <sup>-11</sup> | 0.093 | '- | [1.19-1.37] | ZGLP1            | COVID-19<br>(critical illness vs population or mild symptoms) | COVID-19 | GCST90104030 | 19:10305768 |



|                           |           |       |    |             |           |                                                               |          |              |             |
|---------------------------|-----------|-------|----|-------------|-----------|---------------------------------------------------------------|----------|--------------|-------------|
| rs34536443-<br><b>C</b>   | 7 x 10-17 | 0.05  | '- | [1.36-1.65] | TYK2      | COVID-19<br>(critical illness vs population or mild symptoms) | COVID-19 | GCST90104030 | 19:10352442 |
| rs368565-<br><b>T</b>     | 4 x 10-11 | 0.44  | '- | [1.1-1.2]   | FUT2      | COVID-19<br>(critical illness vs population or mild symptoms) | COVID-19 | GCST90104030 | 19:48697960 |
| rs17860115-<br><b>A</b>   | 1 x 10-21 | 0.32  | '- | [1.19-1.3]  | IFNAR2    | COVID-19<br>(critical illness vs population or mild symptoms) | COVID-19 | GCST90104030 | 21:33230000 |
| rs8178521-<br><b>T</b>    | 4 x 10-12 | 0.27  | '- | [1.12-1.23] | IL10RB    | COVID-19<br>(critical illness vs population or mild symptoms) | COVID-19 | GCST90104030 | 21:33287378 |
| rs35370143-<br><b>TAC</b> | 1 x 10-9  | 0.083 | '- | [1.17-1.36] | LINC00649 | COVID-19<br>(critical illness vs population or mild symptoms) | COVID-19 | GCST90104030 | 21:33959663 |

|                           |           |        |    |                |                     |                                                               |          |              |                       |
|---------------------------|-----------|--------|----|----------------|---------------------|---------------------------------------------------------------|----------|--------------|-----------------------|
| rs7528026-<br><b>A</b>    | 2 x 10-8  | NR     | '- | '-             | TRIM46              | COVID-19<br>(critical illness vs population or mild symptoms) | COVID-19 | GCST90104034 | 1:155175305           |
| rs8176719-<br><b>TC</b>   | 4 x 10-19 | 0.337  | '- | [1.08-1.13]    | ABO                 | COVID-19                                                      | COVID-19 | GCST90103486 | 9:133257522           |
| rs60870724-<br><b>C</b>   | 7 x 10-14 | 0.333  | '- | [0.88-0.93]    | CEP97,<br>NXPE3     | COVID-19                                                      | COVID-19 | GCST90103486 | 3:101776487           |
| rs73062389-<br><b>A</b>   | 4 x 10-19 | 0.064  | '- | [1.19-1.31]    | SLC6A20             | COVID-19                                                      | COVID-19 | GCST90103487 | 3:45793925            |
| rs73910904-<br><b>A</b>   | 4 x 10-8  | 0.016  | '- | [1.41-2.06]    | SILC1,<br>LINC01247 | COVID-19                                                      | COVID-19 | GCST90103489 | 2:6013310             |
| rs190509934-<br><b>C</b>  | 5 x 10-13 | NR     | '- | [0.52-0.69]    | ACE2                | COVID-19<br>(covid vs negative or unknown)                    | COVID-19 | GCST90096800 | X:15602217            |
| rs879055593-<br><b>T</b>  | 7 x 10-34 | NR     | '- | [1.081-1.114]  | ABO                 | COVID-19<br>(covid vs negative or unknown)                    | COVID-19 | GCST90096800 | 9:133271182           |
| rs2531743-<br><b>G</b>    | 3 x 10-12 | NR     | '- | [0.927-0.958]  | LZTFL1,<br>SLC6A20  | COVID-19<br>(covid vs negative)                               | COVID-19 | GCST90103428 | 3:45796808            |
| rs769102632-<br><b>A</b>  | 3 x 10-8  | 2.0E-5 | '- | [8.37-85.38]   | '-                  | COVID-19                                                      | COVID-19 | GCST90093364 | Mapping not available |
| rs1256764500-<br><b>G</b> | 4 x 10-8  | 1.0E-5 | '- | [8.25-85.77]   | '-                  | COVID-19                                                      | COVID-19 | GCST90093364 | Mapping not available |
| rs754119466-<br><b>G</b>  | 3 x 10-9  | 4.0E-5 | '- | [13.61-177.85] | '-                  | COVID-19<br>(hospitalize)                                     | COVID-19 | GCST90093366 | Mapping not available |

|                             |                       |        |                         |                |       |                                                          |          |              |                       |
|-----------------------------|-----------------------|--------|-------------------------|----------------|-------|----------------------------------------------------------|----------|--------------|-----------------------|
|                             |                       |        |                         |                |       | d vs population)                                         |          |              |                       |
| rs761377603-<br><b>T</b>    | 2 x 10 <sup>-8</sup>  | 3.0E-5 | '-                      | [10.75-140.9]  | TES   | COVID-19 (hospitalized vs population)                    | COVID-19 | GCST90093366 | 7:116250230           |
| rs2287960-<br><b>T</b>      | 4 x 10 <sup>-8</sup>  | 2.0E-5 | '-                      | [11.17-165.02] | SHC2  | COVID-19 (hospitalized vs population)                    | COVID-19 | GCST90093366 | 19:422238             |
| chr20:58350370-<br><b>A</b> | 2 x 10 <sup>-9</sup>  | 0.0176 | 0.828 unit decrease     | [0.56-1.1]     | '-    | General population vs COVID-19 exposed negative controls | COVID-19 | GCST90094648 | Mapping not available |
| chr10:14687933-<br><b>A</b> | 2 x 10 <sup>-8</sup>  | 0.1295 | 0.4831 unit increase    | [0.31-0.65]    | '-    | COVID-19 (hospitalized vs population)                    | COVID-19 | GCST90094646 | Mapping not available |
| rs146100088-<br><b>?</b>    | 7 x 10 <sup>-8</sup>  | NR     | 1.455542 unit increase  | [0.93-1.98]    | MYRIP | COVID-19 (hospitalized covid vs population)              | COVID-19 | GCST90027246 | 3:39838227            |
| rs183817891-<br><b>?</b>    | 1 x 10 <sup>-11</sup> | NR     | 0.5624724 unit increase | [0.4-0.73]     | XCR1  | COVID-19 (hospitalized covid vs population)              | COVID-19 | GCST90027246 | 3:46053730            |
| rs11385942-<br><b>?</b>     | 3 x 10 <sup>-16</sup> | '-     | '-                      | [1.43-1.80]    | '-    | COVID-19                                                 | COVID-19 | GCST012399   | Mapping not available |

|                          |                       |         |                            |                                         |                  |                                                |          |              |                       |
|--------------------------|-----------------------|---------|----------------------------|-----------------------------------------|------------------|------------------------------------------------|----------|--------------|-----------------------|
| chr11:11407970- <b>C</b> | 2 x 10 <sup>-8</sup>  | 0.2258  | 0.4641<br>unit<br>increase | [0.3-0.63]                              | '-               | COVID-19<br>(hospitalized vs not hospitalized) | COVID-19 | GCST90101882 | Mapping not available |
| rs10774671- <b>A</b>     | 4 x 10 <sup>-13</sup> | 0.6518  | '-                         | [1.1422351034880305-1.2604553442434507] | OAS1             | COVID-19<br>(critical illness vs population)   | COVID-19 | GCST90095123 | 12:112919388          |
| rs77534576- <b>T</b>     | 4 x 10 <sup>-9</sup>  | 0.03275 | '-                         | [1.2784125078885984-1.635422073558583]  | RNU6-1313P, TAC4 | COVID-19<br>(critical illness vs population)   | COVID-19 | GCST90095123 | 17:49863303           |
| rs2109069- <b>A</b>      | 1 x 10 <sup>-21</sup> | 0.3158  | '-                         | [1.2014454336815512-1.3203998930516965] | DPP9             | COVID-19<br>(critical illness vs population)   | COVID-19 | GCST90095123 | 19:4719431            |
| rs74956615- <b>A</b>     | 1 x 10 <sup>-11</sup> | 0.04816 | '-                         | [1.2926896399458667-1.5907330695298332] | RAVER1           | COVID-19<br>(critical illness vs population)   | COVID-19 | GCST90095123 | 19:10317045           |
| rs10490770- <b>C</b>     | 1 x 10 <sup>-73</sup> | 0.08141 | '-                         | [1.5622524842496601-1.740532881367777]  | SLC6A20, LZTFL1  | COVID-19<br>(hospitalized vs population)       | COVID-19 | GCST90095124 | 3:45823240            |
| rs1886814- <b>C</b>      | 1 x 10 <sup>-9</sup>  | 0.04242 | '-                         | [1.1708908156456612-1.35987823139442]   | FOXP4-AS1        | COVID-19<br>(hospitalized vs population)       | COVID-19 | GCST90095124 | 6:41534945            |
| rs72711165- <b>C</b>     | 2 x 10 <sup>-9</sup>  | 0.01337 | '-                         | [1.2355706893674907-                    | TMEM65           | COVID-19<br>(hospitalize                       | COVID-19 | GCST90095124 | 8:124324323           |

|                          |               |        |    |                                                     |                         |                                                                |          |              |             |
|--------------------------|---------------|--------|----|-----------------------------------------------------|-------------------------|----------------------------------------------------------------|----------|--------------|-------------|
|                          |               |        |    | 1.5180506428830653<br>]                             |                         | d vs<br>population)                                            |          |              |             |
| rs1819040-<br><b>A</b>   | 2 x 10-<br>10 | 0.1855 | '- | [0.844849410443158<br>5-<br>0.9145683076087429<br>] | KANSL1                  | COVID-19<br>(hospitalize<br>d vs<br>population)                | COVID-19 | GCST90095124 | 17:46142465 |
| rs13050728-<br><b>C</b>  | 3 x 10-<br>20 | 0.6511 | '- | [0.833852759142961<br>4-<br>0.8886591191741529<br>] | IFNAR2                  | COVID-19<br>(hospitalize<br>d vs<br>population)                | COVID-19 | GCST90095124 | 21:33242905 |
| rs2271616-<br><b>T</b>   | 2 x 10-<br>34 | 0.1178 | '- | [1.128340128519996<br>-<br>1.1814852813843186<br>]  | SLC6A20                 | SARS-CoV-2<br>infection                                        | COVID-19 | GCST90095125 | 3:45796521  |
| rs11919389-<br><b>C</b>  | 3 x 10-<br>15 | 0.3515 | '- | [0.927301822309455<br>2-<br>0.9556267949509863<br>] | PDCL3P4                 | SARS-CoV-2<br>infection                                        | COVID-19 | GCST90095125 | 3:101705614 |
| rs912805253-<br><b>T</b> | 1 x 10-<br>39 | 0.6512 | '- | [0.891421795415127<br>1-<br>0.9183814681761949<br>] | ABO                     | SARS-CoV-2<br>infection                                        | COVID-19 | GCST90095125 | 9:133274084 |
| rs4801778-<br><b>T</b>   | 1 x 10-8      | 0.1798 | '- | [0.928140541574960<br>7-<br>0.9642334091548289<br>] | PLEKHA4                 | SARS-CoV-2<br>infection                                        | COVID-19 | GCST90095125 | 19:48867352 |
| rs142658912-<br><b>?</b> | 3 x 10-8      | NR     | '- | [2.711-8.048]                                       | GTF2IP23,<br>GTF2IRD1P1 | COVID-19<br>(covid<br>respiratory<br>support vs<br>population) | COVID-19 | GCST90027248 | 7:66879664  |

|                          |                       |    |                                |               |                       |                                                                      |                                                     |              |             |
|--------------------------|-----------------------|----|--------------------------------|---------------|-----------------------|----------------------------------------------------------------------|-----------------------------------------------------|--------------|-------------|
| rs117479047-<br><b>?</b> | 4 x 10 <sup>-8</sup>  | NR | '-                             | [0.047-0.232] | GNAI2P2,<br>LINC00856 | COVID-19<br>(covid<br>respiratory<br>support vs<br>population)       | COVID-19                                            | GCST90027248 | 10:78069803 |
| rs138476573-<br><b>?</b> | 8 x 10 <sup>-8</sup>  | NR | 0.778051<br>9 unit<br>increase | [0.5-1.06]    | PAFAH1B2P<br>2, RMST  | COVID-19<br>(hospitalize<br>d covid vs<br>population)                | COVID-19                                            | GCST90027246 | 12:97636026 |
| rs6603626-<br><b>?</b>   | 6 x 10 <sup>-8</sup>  | NR | 0.067746<br>1 unit<br>increase | [0.043-0.092] | LAMP2,<br>RNU7-37P    | COVID-19<br>(covid vs<br>negative)                                   | COVID-19                                            | GCST90027245 | X:120484021 |
| rs35044562-<br><b>?</b>  | 4 x 10 <sup>-14</sup> | NR | '-                             | [1.555-2.114] | LZTFL1                | COVID-19<br>(hospitalize<br>d covid vs<br>population)                | COVID-19                                            | GCST90027246 | 3:45867532  |
| rs9411378-<br><b>C</b>   | 5 x 10 <sup>-20</sup> | NR | '-                             | [0.829-0.886] | ABO                   | COVID-19<br>(covid vs<br>negative)                                   | COVID-19                                            | GCST90027245 | 9:133270015 |
| rs12564811-<br><b>?</b>  | 3 x 10 <sup>-8</sup>  | NR | '-                             | NR            | LCE2B,<br>LCE2A       | COVID-19<br>or psoriasis<br>(trans-<br>disease<br>meta-<br>analysis) | psoriasis,<br>COVID-19                              | GCST011477   | 1:152693204 |
| rs13078854-<br><b>G</b>  | 2 x 10 <sup>-18</sup> | NR | '-                             | [0.527-0.665] | SLC6A20,<br>LZTFL1    | COVID-19<br>(severe<br>respiratory<br>symptoms<br>vs<br>population)  | respiratory<br>symptom<br>measuremen<br>t, COVID-19 | GCST90027249 | 3:45820440  |

|                             |           |        |                                |               |                     |                                                                                                         |                                                              |              |                          |
|-----------------------------|-----------|--------|--------------------------------|---------------|---------------------|---------------------------------------------------------------------------------------------------------|--------------------------------------------------------------|--------------|--------------------------|
| rs140221038-<br><b>?</b>    | 1 x 10-13 | NR     | 0.529737<br>9 unit<br>increase | [0.39-0.67]   | FYCO1               | COVID-19<br>(severe<br>respiratory<br>symptoms<br>vs<br>population)                                     | respiratory<br>symptom<br>measuremen<br>t, COVID-19          | GCST90027249 | 3:45954233               |
| rs111793438-<br><b>?</b>    | 2 x 10-11 | NR     | 0.379308<br>unit<br>decrease   | [0.27-0.49]   | XCR1                | COVID-19<br>(severe<br>respiratory<br>symptoms<br>vs<br>population)                                     | respiratory<br>symptom<br>measuremen<br>t, COVID-19          | GCST90027249 | 3:46081695               |
| rs1173773-<br><b>C</b>      | 5 x 10-8  | NR     | '-                             | [1.15-1.35]   | NPR3                | Symptoms<br>in COVID-<br>19<br>outpatients<br>at risk of<br>severe<br>disease<br>(time to<br>remission) | time to<br>remission of<br>COVID-19<br>symptoms,<br>COVID-19 | GCST012002   | 5:32750877               |
| rs5913398-<br><b>?</b>      | 3 x 10-8  | NR     | 0.574699<br>4 unit<br>increase | [0.37-0.78]   | RNU6-995P,<br>HMGNS | COVID-19<br>(severe<br>respiratory<br>symptoms<br>vs<br>population)                                     | respiratory<br>symptom<br>measuremen<br>t, COVID-19          | GCST90027249 | X:81083060               |
| chr22:4959793<br>5-<b>T</b> | 6 x 10-8  | 0.1909 | 0.1454<br>unit<br>increase     | [0.093-0.198] | '-                  | COVID-19<br>severity<br>score                                                                           | COVID-19<br>symptoms<br>measuremen<br>t, COVID-19            | GCST90094650 | Mapping not<br>available |

|                         |                      |      |    |             |    |                                                                                                                            |                                                                                         |            |             |
|-------------------------|----------------------|------|----|-------------|----|----------------------------------------------------------------------------------------------------------------------------|-----------------------------------------------------------------------------------------|------------|-------------|
| rs62575331-<br><b>G</b> | 3 x 10 <sup>-8</sup> | 0.12 | '- | [1.34-1.84] | U2 | Symptoms<br>in placebo-<br>treated<br>COVID-19<br>outpatients<br>at risk of<br>severe<br>disease<br>(time to<br>remission) | time to<br>remission of<br>COVID-19<br>symptoms,<br>COVID-19,<br>response to<br>placebo | GCST012001 | 9:115647521 |
|-------------------------|----------------------|------|----|-------------|----|----------------------------------------------------------------------------------------------------------------------------|-----------------------------------------------------------------------------------------|------------|-------------|

**Table S3.** GWAS catalog of COVID-19. Complete information for sets of genetic variants, regarding relative allele frequencies (RAF) and effect sizes of the associations.



**Figure S4. Expression heat map by genes and tissues (COVID-19)**

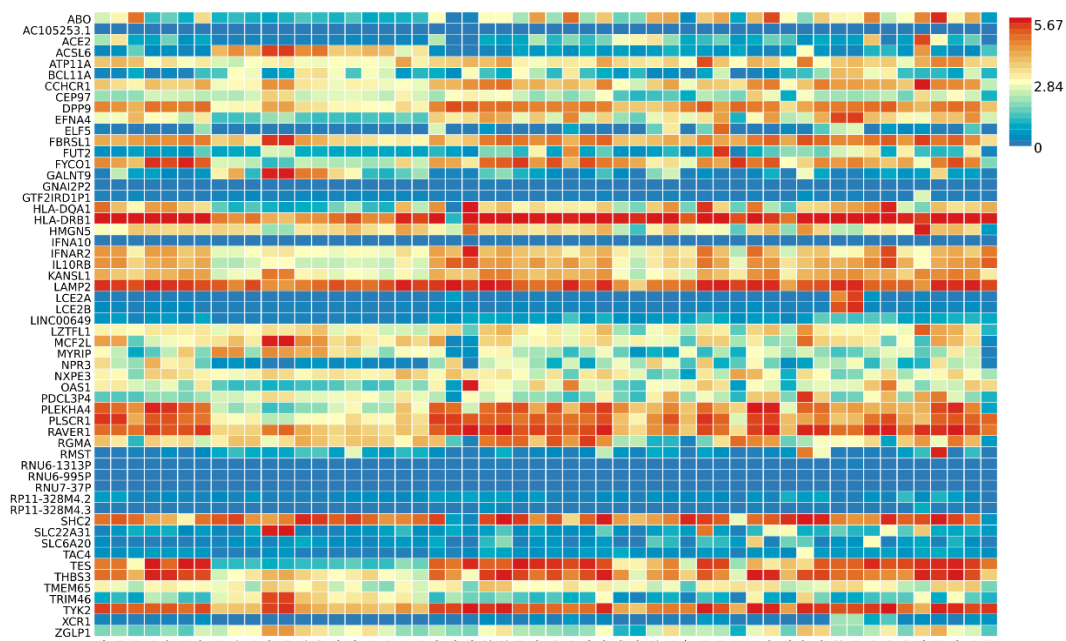

**Figure S4.** Expression heat map by genes and tissues (COVID-19). The tissue-specific expression patterns are based on GTEx v6 RNA-seq data. Cells in red represent higher expression compared to cells in blue. Gene expression comparisons between tissues (horizontal comparison) within a gene (y axis) are comparable but not those of different genes within a tissue (vertical comparison). Thus, cells in red represent a higher expression of genes in a corresponding tissue compared to other tissues, but do NOT represent higher expression compared to other genes. Source: FUMA

Figure S5. REVIGO for vitamin d deficiency and covid 19

A

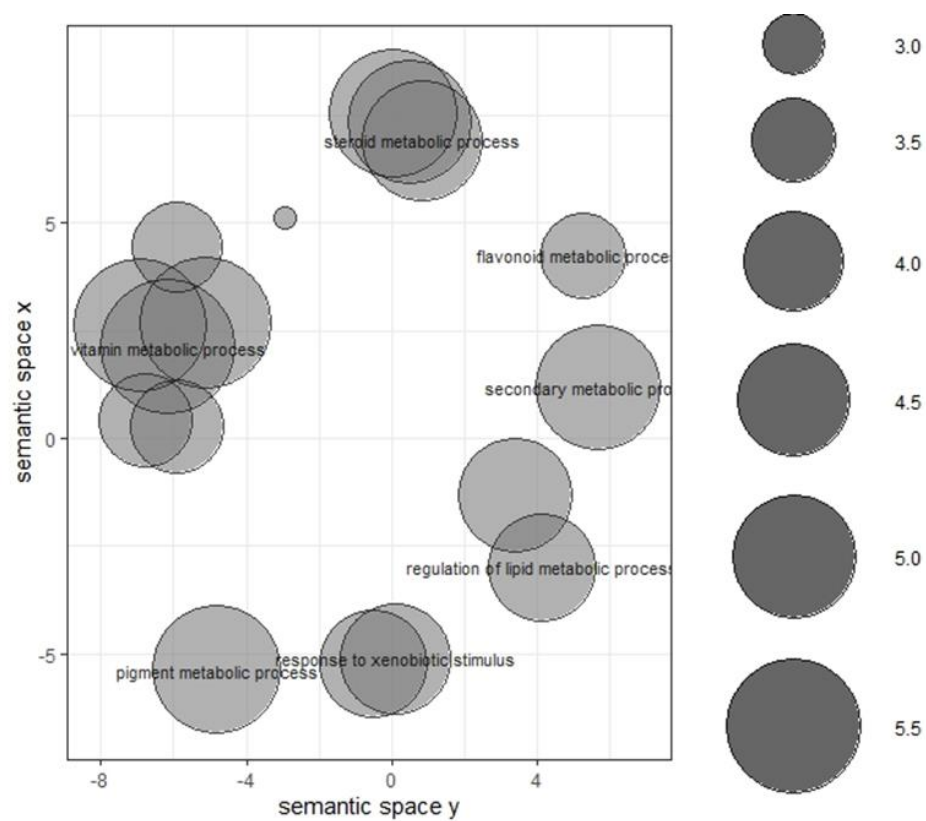

B

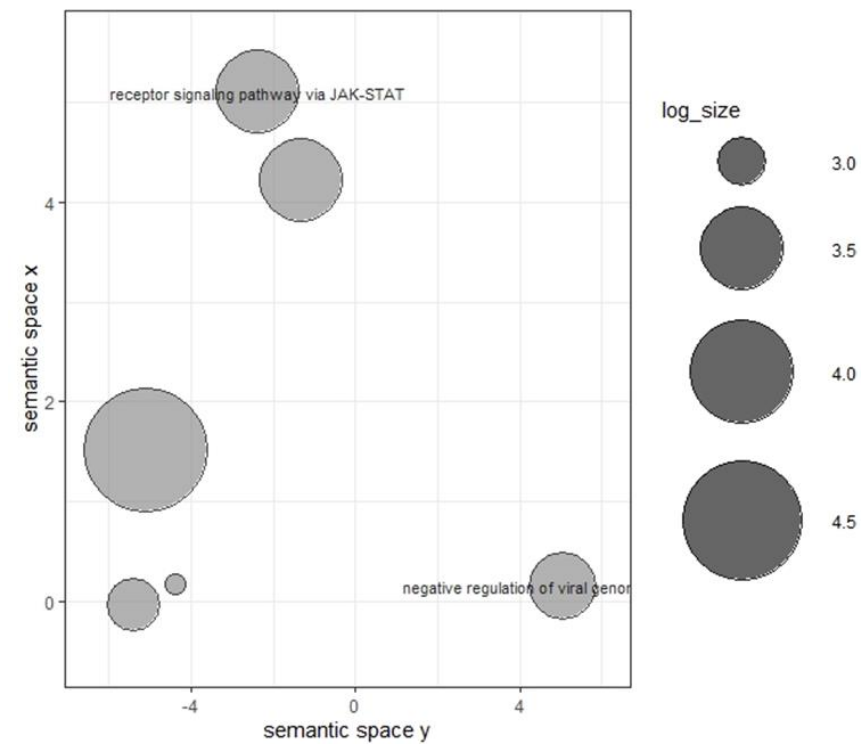

FigureS5: Multidimensional scaling plots obtained in REVIGO platform of the matrix of GO terms (log-scale) for vitamin D deficiency (A) and COVID-19 (B). Semantically similar GO terms are closer in the plot. Source: Revigo

**Figure S6. Enrichment analysis of COVID-19 genes regarding GO terms in MSigDB on immunological signatures.**

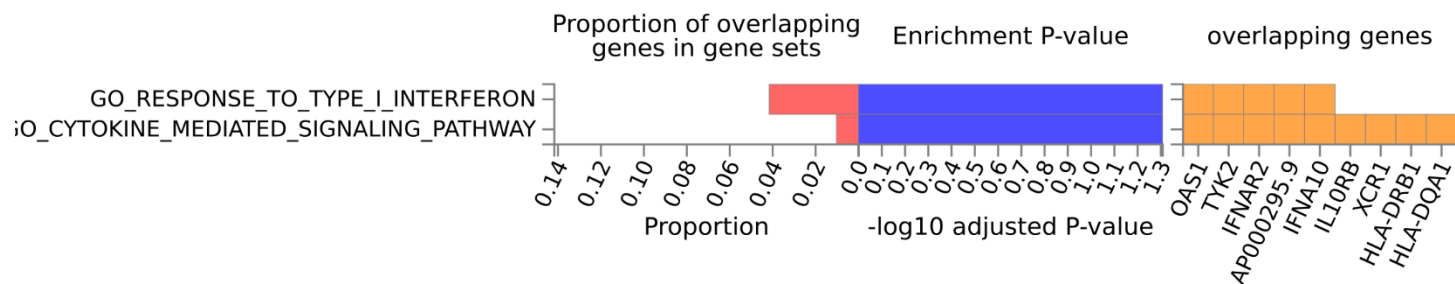

**Figure S6:** Pathways and processes that are overrepresented in the gene set of interest are shown. Also, only genes present in a given pathway or process are given. Overrepresentation of the gene set of interest (input genes) regarding pathways and functions was tested using the hypergeometric test against pre-defined gene sets (background genes) obtained from MSigDB. Input genes that are overlapping in the pathway or process, the enrichment P-value and the proportion of overlapping genes (input genes relative to the tested gene set) are shown. Source: FUMA









**Figure S10. COVID-19 gene-disease heat map**

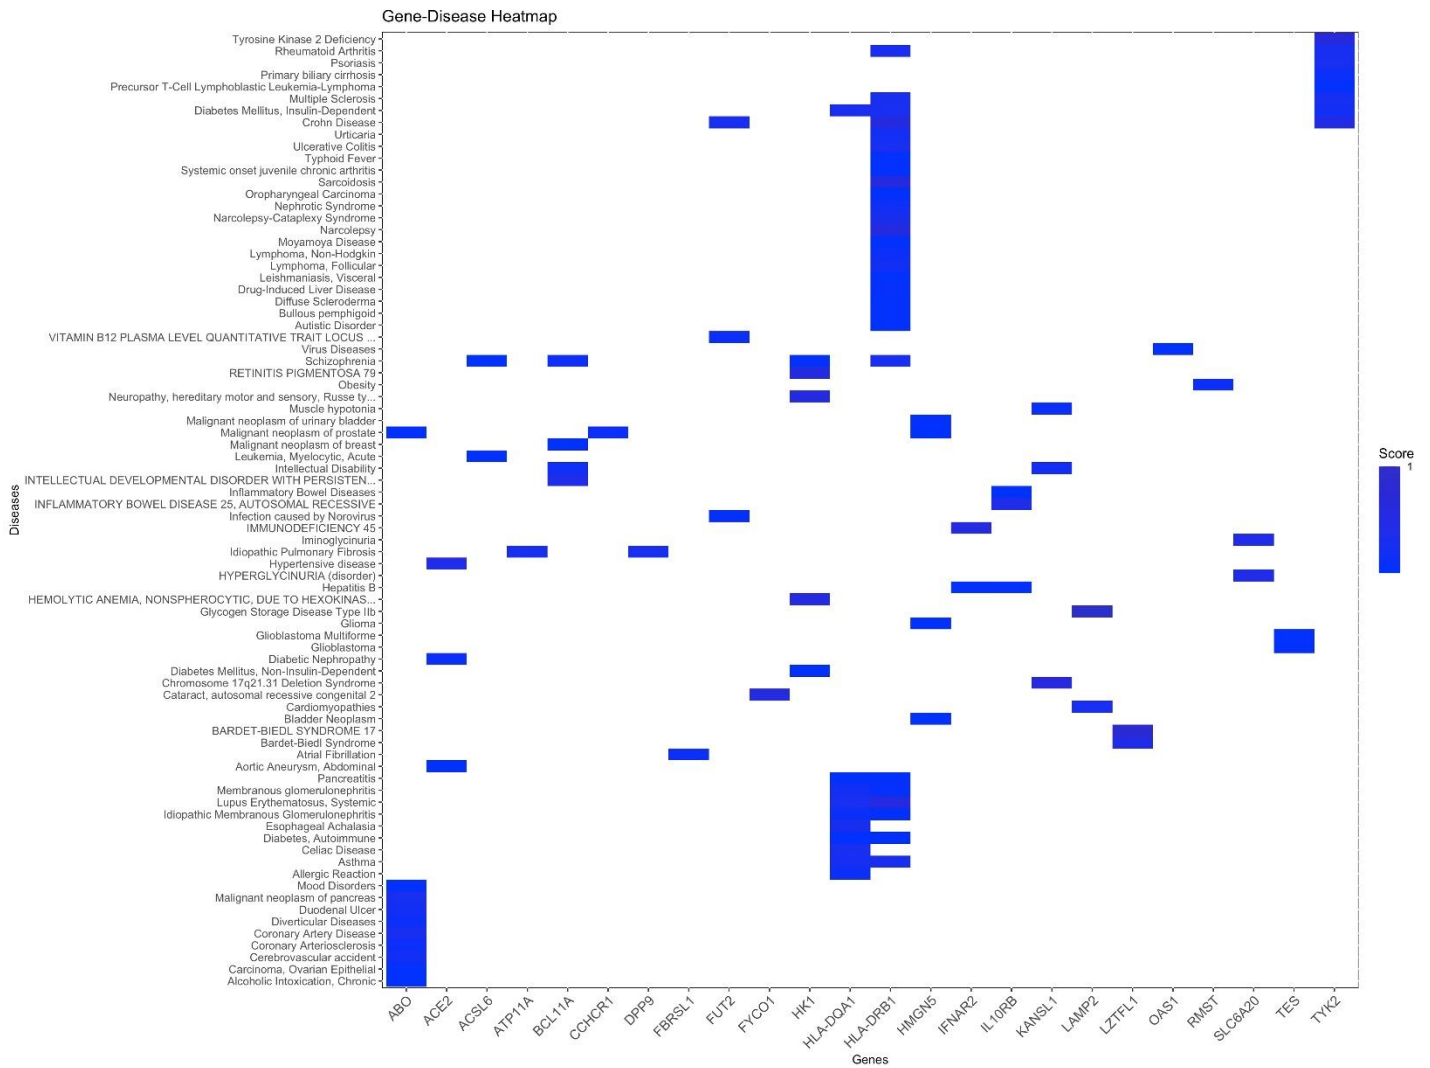

**Figure S10. COVID-19 gene-disease heat map.** In this map, the color scale is proportional to the gene-disease association score. The graph shows the 50 GDAs with the highest score. Source: disgenet2r (R package).



Figure S11. Enrichment analysis of VD deficiency and the VDR gene

A

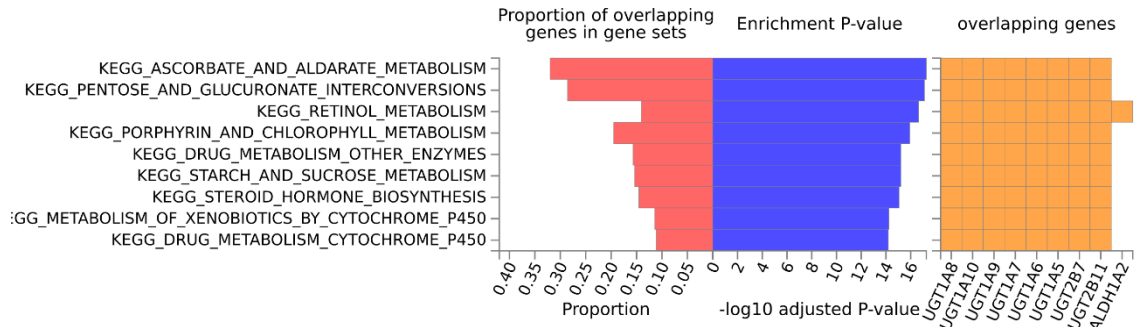

B

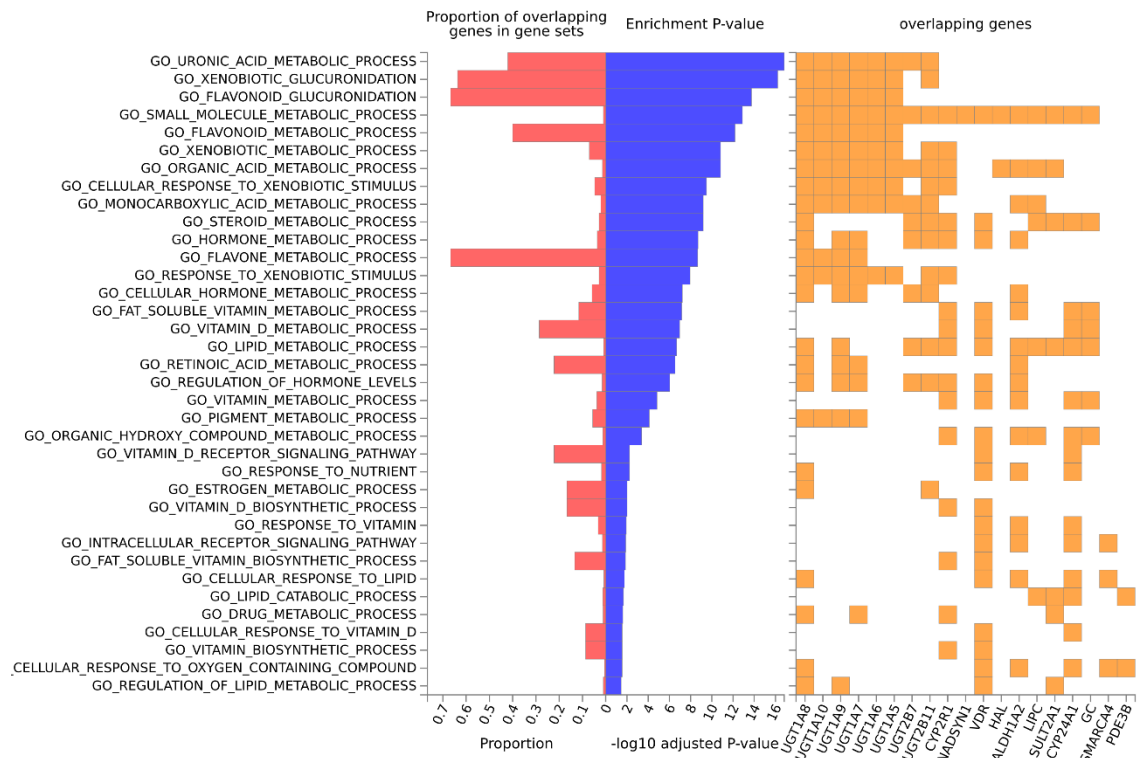

**Figure S11.** Enrichment analysis of VD deficiency and the VDR gene regarding KEGG pathways (A) and GO in MSigDB on biological processes (B). Pathways and processes that are overrepresented in the gene set of interest are shown. Also, only genes present in a given pathway or process are given. Overrepresentation of the gene set of interest (input genes) regarding pathways and functions was tested using the hypergeometric test against pre-defined gene sets (background genes) obtained from MSigDB or KEGG. Input genes that are overlapping in the pathway or process, the enrichment P-value and the proportion of overlapping genes (input genes relative to the tested gene set) are shown. Source: FUMA
